# Supplementary material for: Small molecule-derived pH-gated ion transporters
Source: Royal Society of Chemistry journal article supplement (doi:10.1039/d3ob00496a), 2023-01-01
Supplement: d3ob00496a1.pdf [file d3ob00496a1.pdf]

## Supporting Information

### Small Molecule derived pH-Gated Ion Transporters

Narendra Kumar<sup>a</sup> and Nandita Madhavan<sup>b</sup> \*

**Table S1:** Anticancerous activity of different transporters with cancerous cell lines and normal cell lines

| CO<br>MP<br>OU<br>NDS | IC <sub>50</sub> (μM) for cancerous cell lines |                 |             |            |                |       |                |                |               |       | IC <sub>50</sub> (μM) for normal cell line |                |
|-----------------------|------------------------------------------------|-----------------|-------------|------------|----------------|-------|----------------|----------------|---------------|-------|--------------------------------------------|----------------|
|                       | Hela                                           | MDA-<br>MB-231  | HCT-<br>116 | OVCAR<br>8 | MCF-7          | A549  | HepG2          | HEYA 8<br>CSCs | SKOV3<br>CSCs | T-47D | MCF-10A                                    | BHK-<br>21     |
| 8b                    | -                                              | 6.0±1.3         | 6.1±0.1     | 9.2±3.3    | 6.1±0.1        | -     | -              | -              | -             | -     | 10.3±3.3                                   | -              |
| 9b                    | -                                              | 6.0±2.6         | 6.1±1.0     | 10.5±3.5   | 7.1±1.2        | -     | -              | -              | -             | -     | >50                                        | -              |
| 10c                   | -                                              | -               | -           | -          | 26.39          | -     | -              | -              | -             | 27.60 | -                                          | 50.22          |
| 10d                   | -                                              | -               | -           | -          | 29.39          | -     | -              | -              | -             | 28.12 | -                                          | 52.37          |
| 11                    | -                                              | -               | -           | -          | 1.0            | -     | -              | -              | -             | -     | -                                          | -              |
| 12b                   | -                                              | -               | -           | -          | -              | 95±25 | -              | -              | -             | -     | -                                          | -              |
| 12c                   | -                                              | -               | -           | -          | -              | 29±4  | -              | -              | -             | -     | -                                          | -              |
| 27                    | 9.59±<br>0.56                                  | -               | -           | -          | 10.51±<br>2.57 | >50   | 12.81±2<br>.17 | -              | -             | -     | -                                          | -              |
| 32a                   | 12.74<br>±3.44                                 | 29.20±4<br>.43  | -           | -          | -              | -     | -              | -              | -             | -     | -                                          | 16.27±<br>2.39 |
| 33b                   | 24.82<br>±3.56                                 | 100.50±<br>5.49 | -           | -          | -              | -     | -              | -              | -             | -     | -                                          | 68.69±<br>7.42 |
| 35b                   | -                                              | -               | -           | -          | -              | -     | -              | 1.5±1.3        | 0.9±0.1       | -     | -                                          | -              |

### References

1. Akhtar, N.; Pradhan, N.; Barik, G. K.; Chatterjee, S.; Ghosh, S.; Saha, A.; Satpati, P.; Bhattacharyya, A.; Santra, M. K.; Manna, D., Quinine-based semisynthetic ion transporters with potential antiproliferative activities. *ACS appl. Mater. & Int.* 2020, **12**, 25521-25533.
2. Saha, A.; Akhtar, N.; Kumar, V.; Kumar, S.; Srivastava, H. K.; Kumar, S.; Manna, D., pH-Regulated anion transport activities of bis (iminourea) derivatives across the cell and vesicle membrane. *Org. Biomol. Chem.* 2019, **17**, 5779-5788.
3. Tapia, L.; Pérez, Y.; Bolte, M.; Casas, J.; Solà, J.; Quesada, R.; Alfonso, I., pH-dependent chloride transport by pseudopeptidic cages for the selective killing of cancer cells in acidic microenvironments. *Angew. Chem. Int. Ed.* 2019, **58**, 12465-12468.

4. Wang, Z.-K.; Hong, X.-Q.; Hu, J.; Xing, Y.-Y.; Chen, W.-H., Synthesis and biological activity of squaramido-tethered bisbenzimidazoles as synthetic anion transporters. *RSC Adv.* 2021, **11**, 3972-3980.
5. Biswas, O.; Akhtar, N.; Vashi, Y.; Saha, A.; Kumar, V.; Pal, S.; Kumar, S.; Manna, D., Chloride ion transport by PITENINs across the phospholipid bilayers of vesicles and cells. *ACS Appl. Bio Mater.* 2020, **3**, 935-944.
6. Shen, F.-F.; Dai, S.-Y.; Wong, N.-K.; Deng, S.; Wong, A. S.-T.; Yang, D., Mediating K<sup>+</sup>/H<sup>+</sup> transport on organelle membranes to selectively eradicate cancer stem cells with a small molecule. *J. Am. Chem. Soc.* 2020, **142**, 10769-10779.
